# Supplementary material
Source: Springer Nature journal article supplement (https://www.springermedizin.de/resource/supplementary/12936_2014_3588_MOESM7_ESM.pdf/9545980)

**(a)**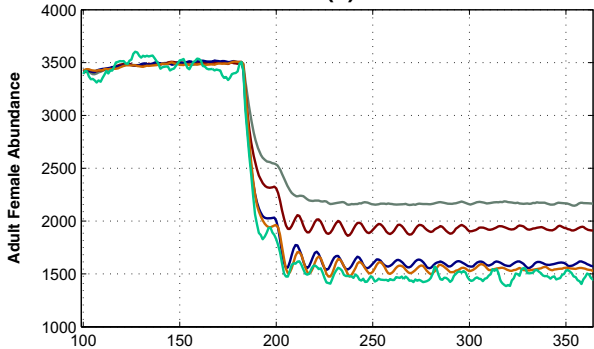**(b)**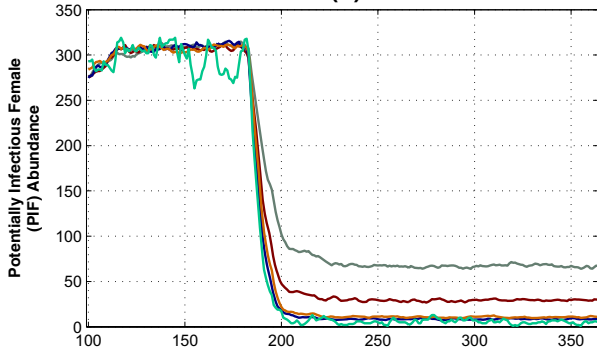

Time (Day)

—  $BMS_{Foraging} C = 50\%$     
 —  $BMD_{Resting} C = 50\%$     
 —  $BMD_{Resting} C = 75\%$     
 —  $BMS_{Foraging} C = 75\%$     
 —  $BMD_{Resting} BMS_{Foraging} C = 50\%$

Supplement: MOESM7 [file 9545980]
